# Supplementary material for: The oxidative phosphorylation inhibitor, atovaquone, upregulates PD-L1 via activation of the ATM/ATR DNA damage response pathway
Source: Research Square preprint supplement (doi:10.21203/rs.3.rs-9476762/v1), 2026-04-28
Supplement: Supplementary file 1 [file 2ee4865aa3a12dcae40b08c1.docx]

Western blots (full blots)

Important point: For ATM and ATM proteins, we used high molecular weight ladder,

For all other proteins we used normal ladder of 250KDa start band size

1. OVCAR-5 (pATR)


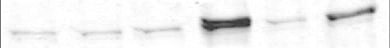


**pATR (Ser428)**


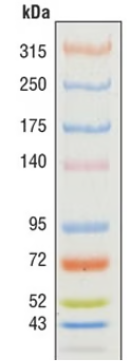

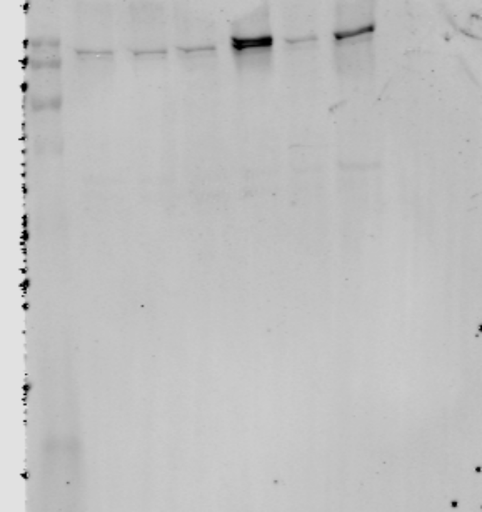

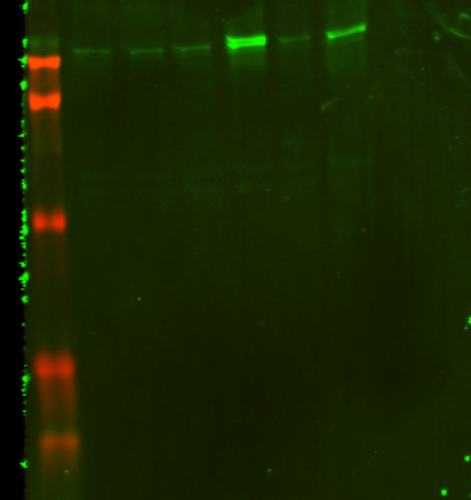


**300kDa**

1. OVCAR-5 (tATR)


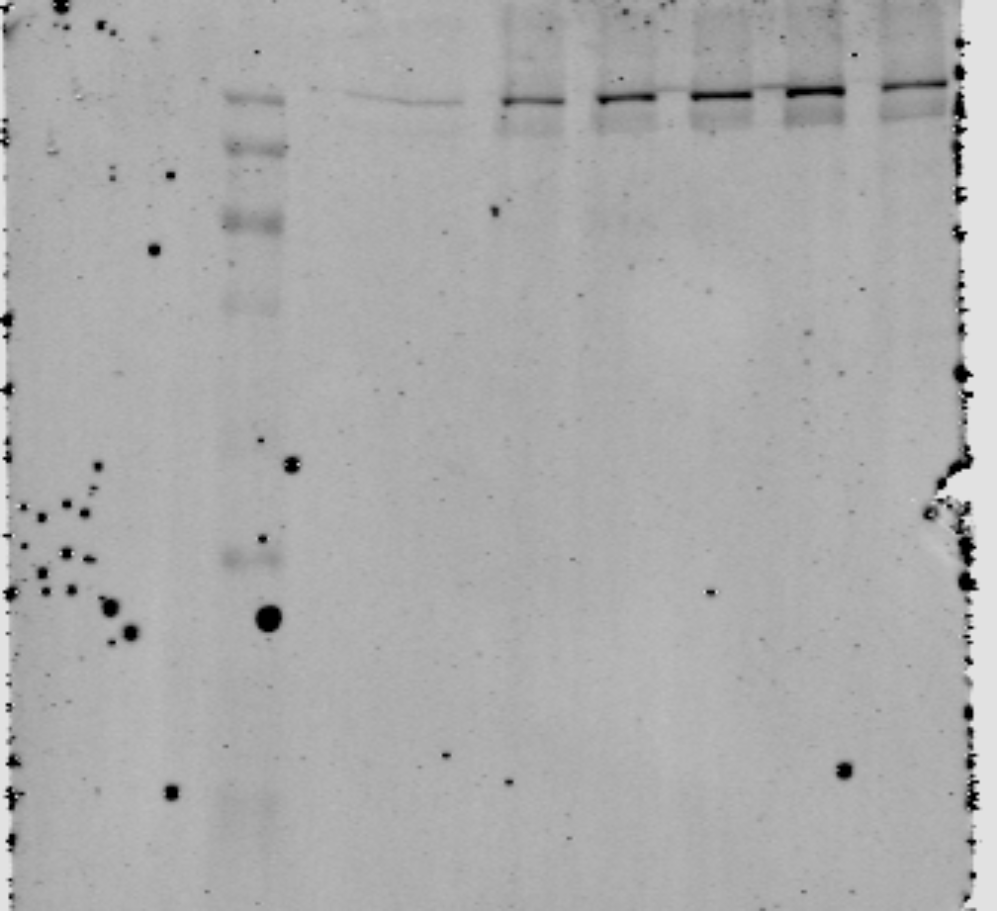


**tATR**


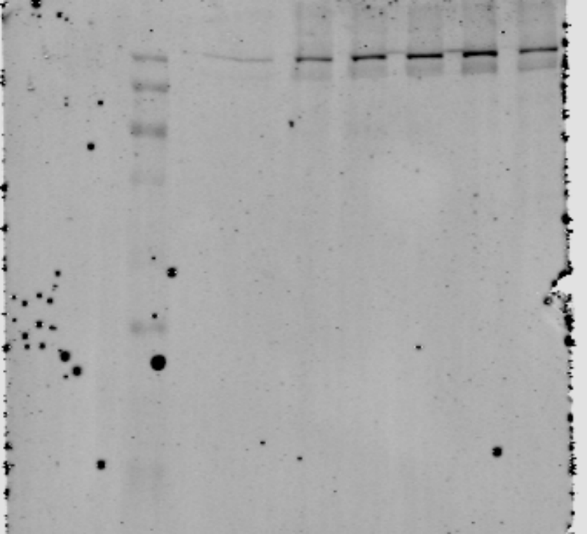

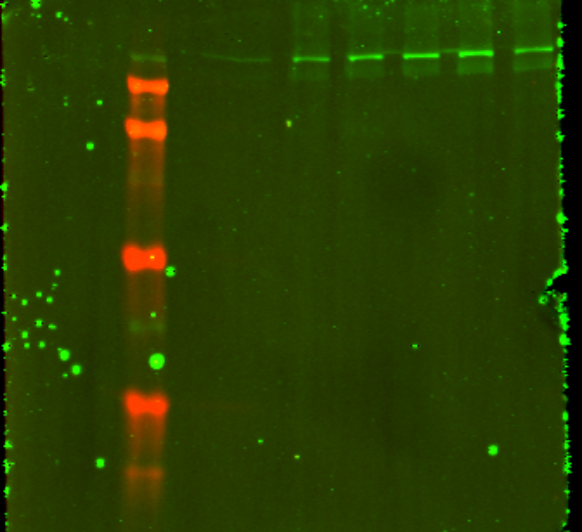


**300kDa**

1. OVCAR-5 (pATM)


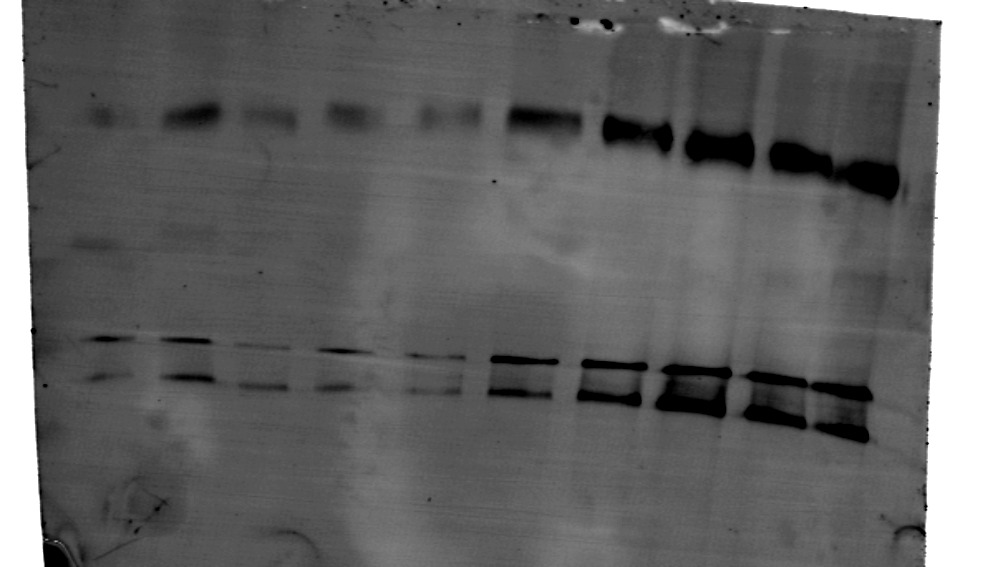


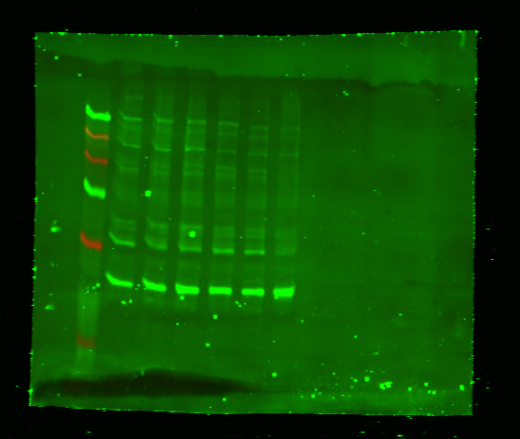

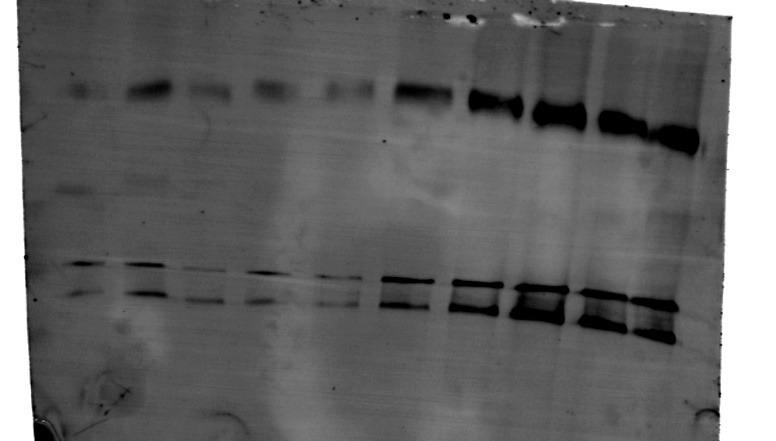

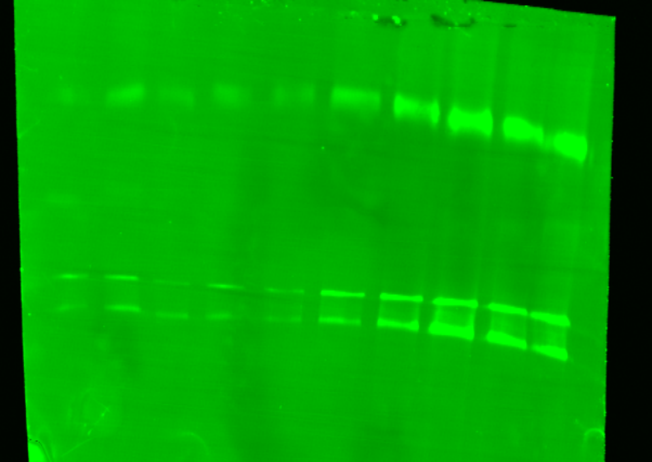


**pATM (Ser1981)**

**350kDa**

1. OVCAR-5 (tATM)


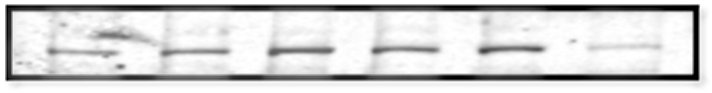


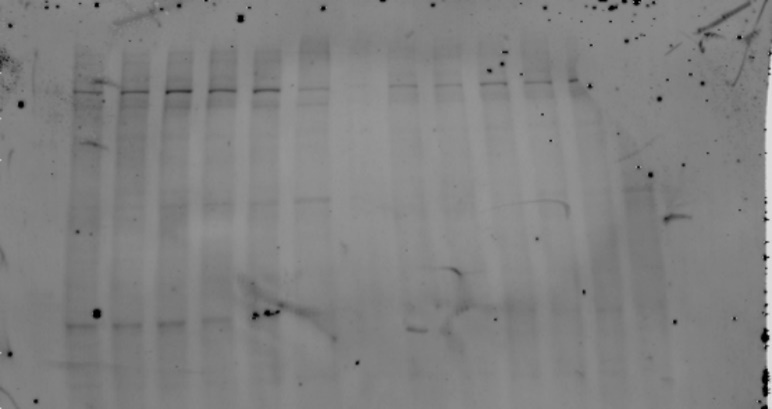

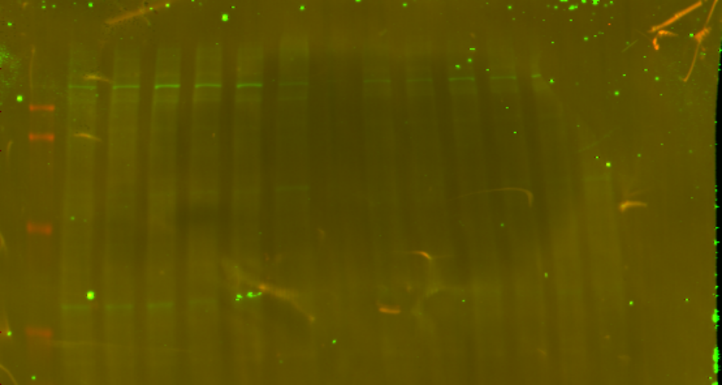


**350kDa**

**tATM**

1. OVCAR-5 pChk1


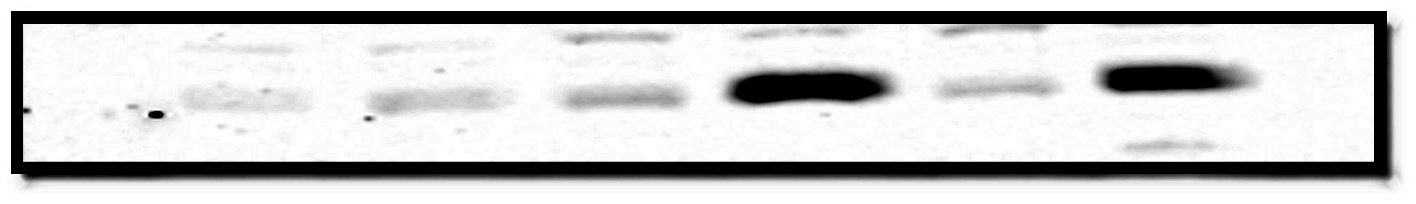


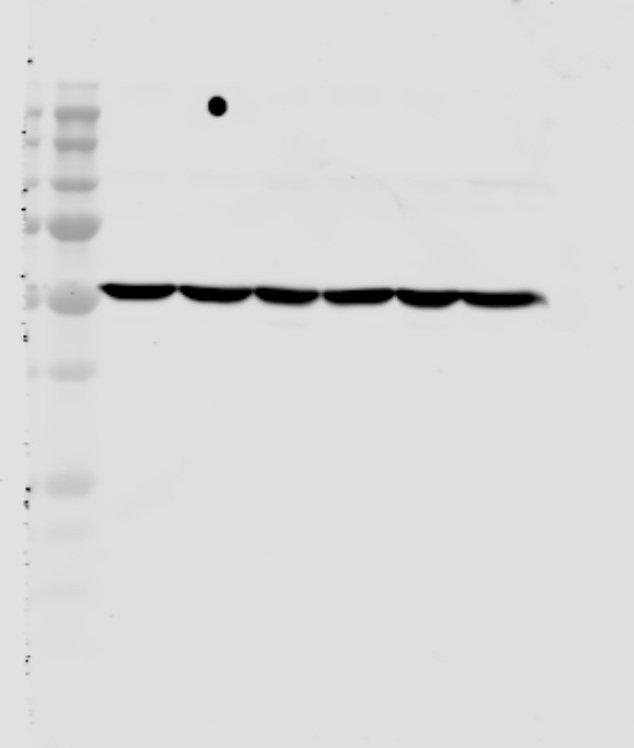

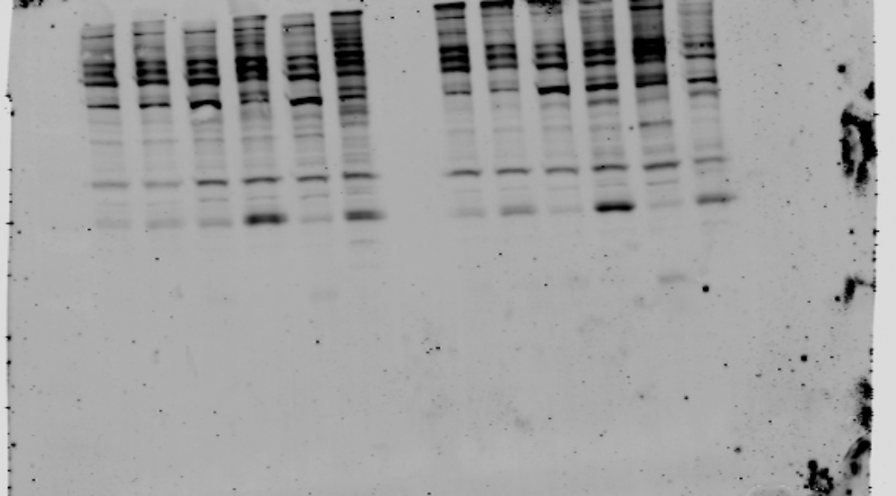

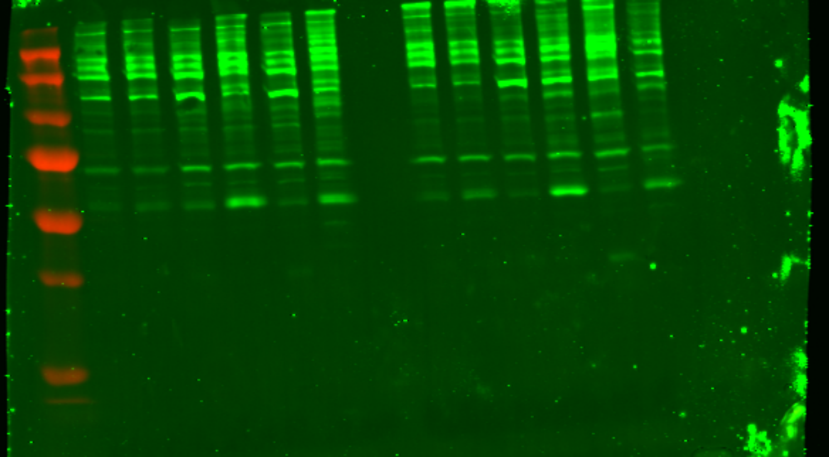


**pChk1 (Ser345)**

**56KDa**

1. OVCAR-5 tChk1


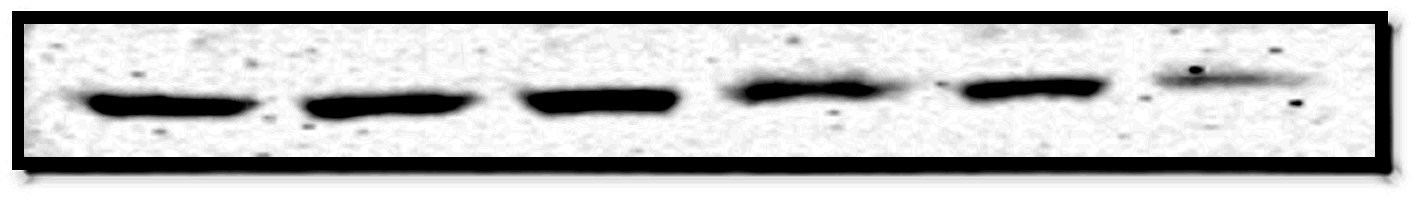


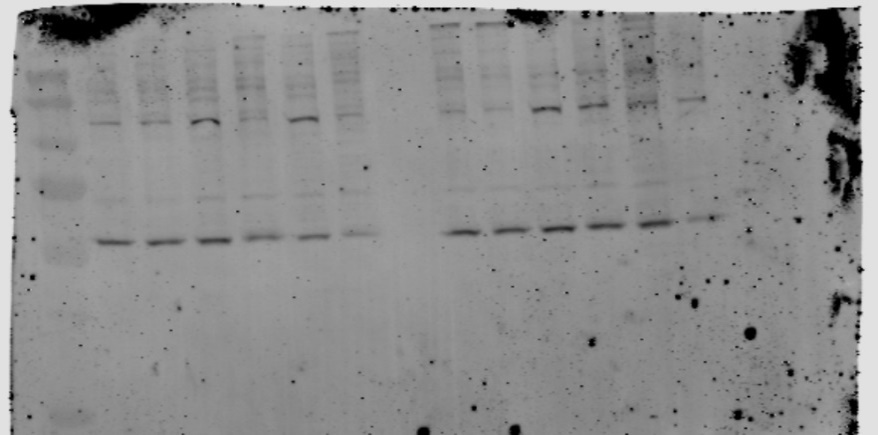

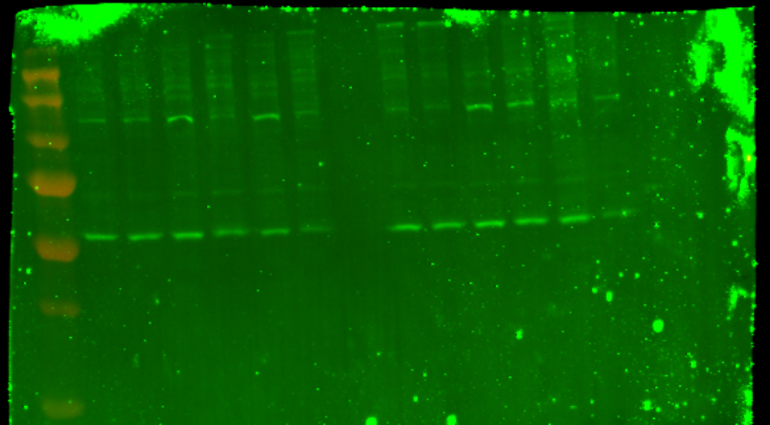


**tChk1**

**56kDa**

1. **OVCAR-5 pChk2 (Thr68)**


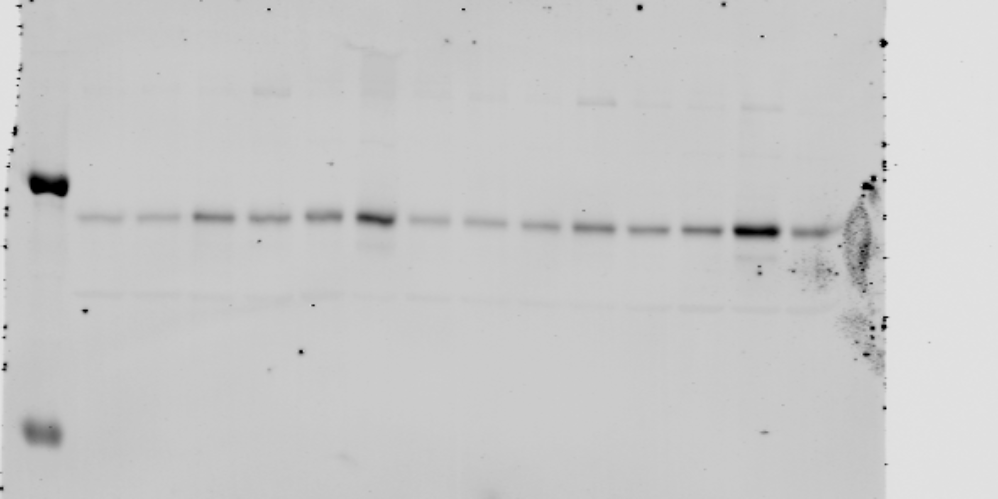


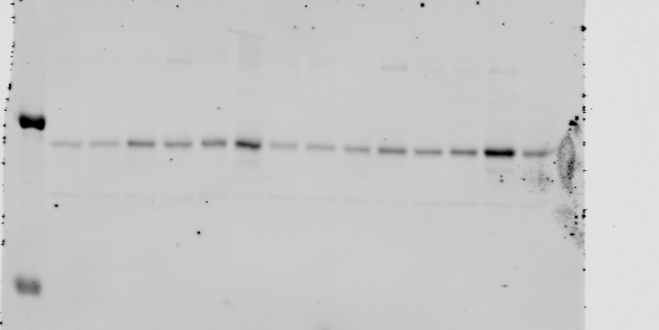

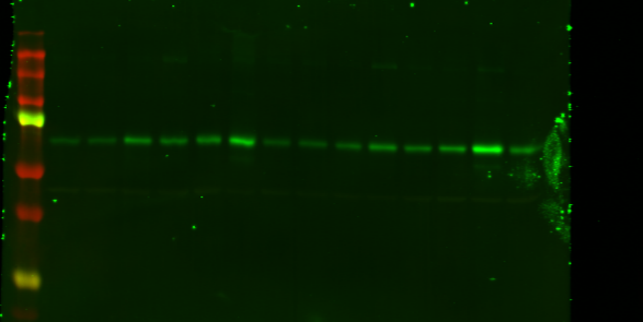


**62kDa**

**pChk2 (Thr68)**

1. OVCAR-5 tChk2


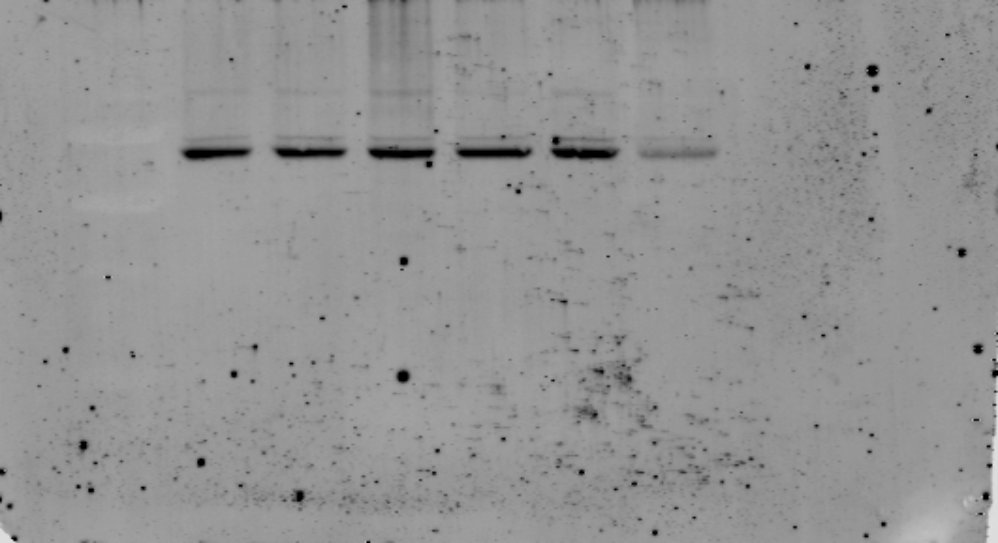


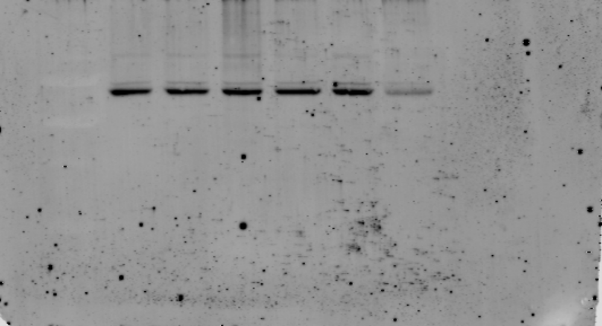

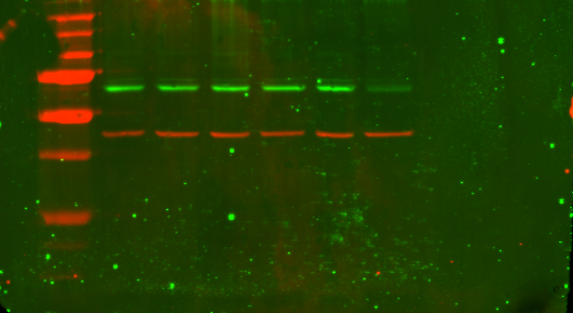


**62kDa**

**tChk2**

1. OVCAR5- **α** Tubulin


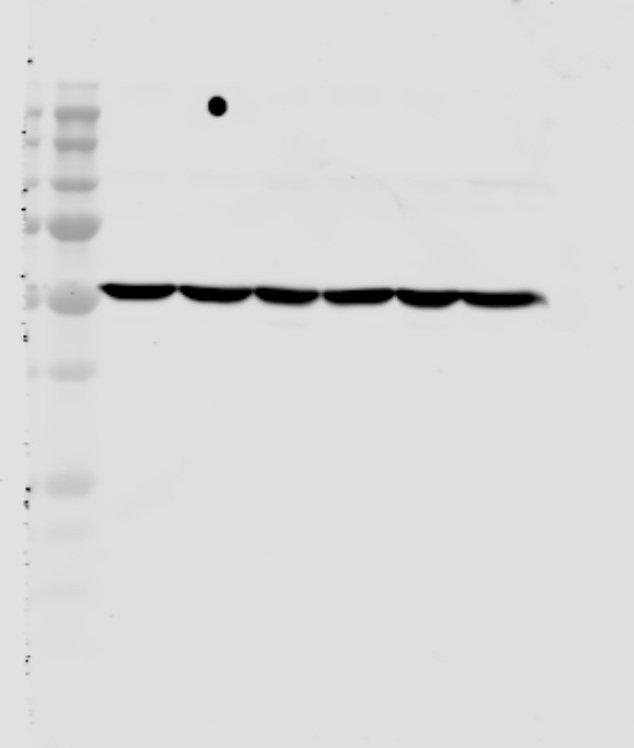


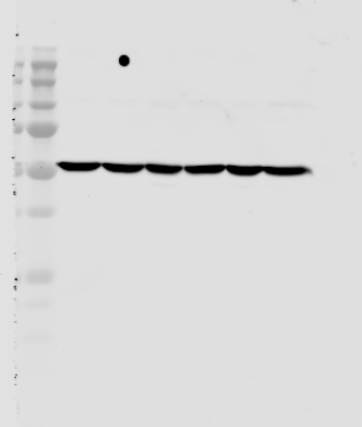

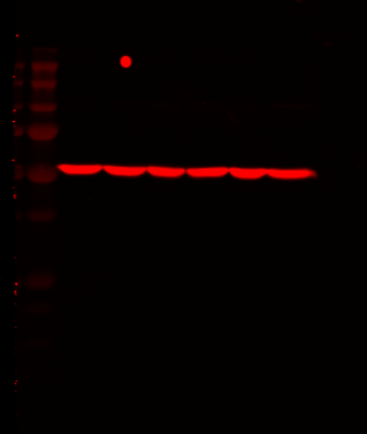


**55kDa**

**α-Tubulin**

1. OVCAR5- **β** Actin


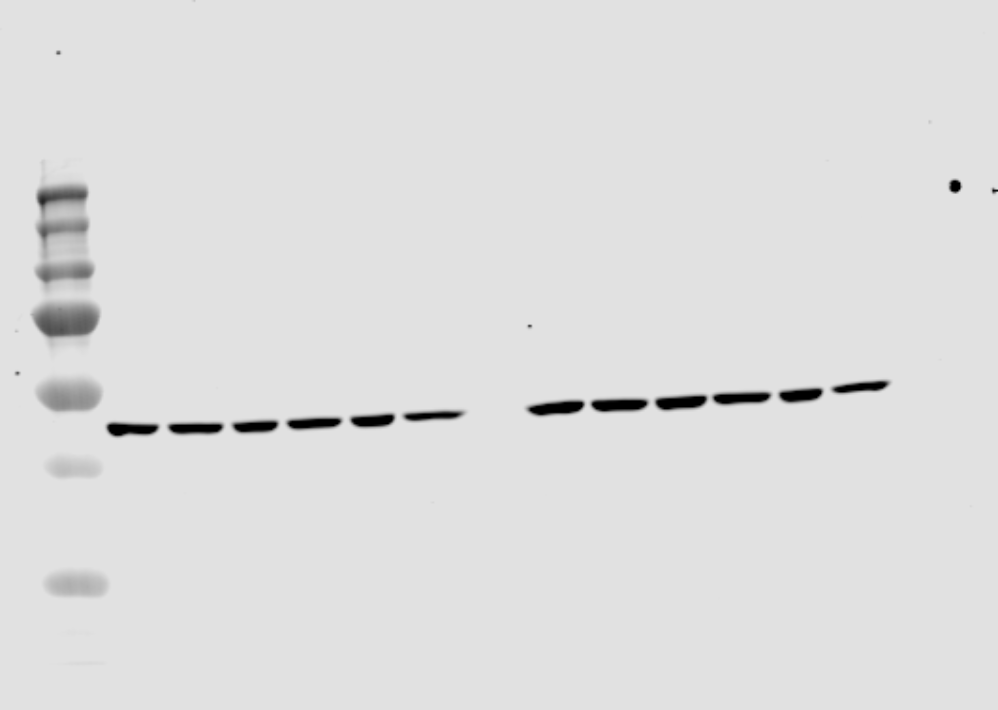


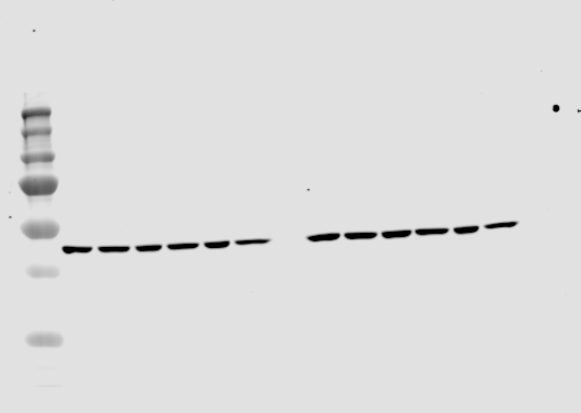

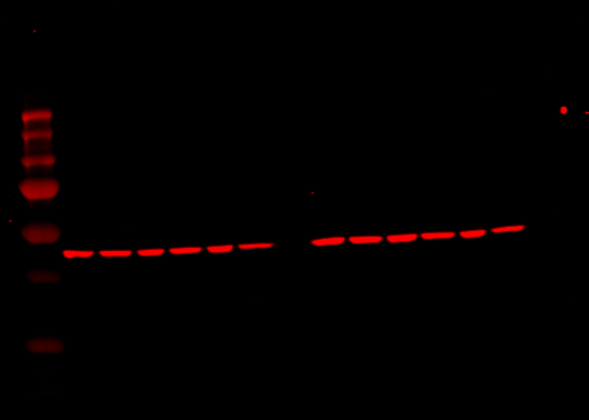


**42kDa**

**β- actin**

1. ID8- pChk1


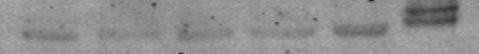


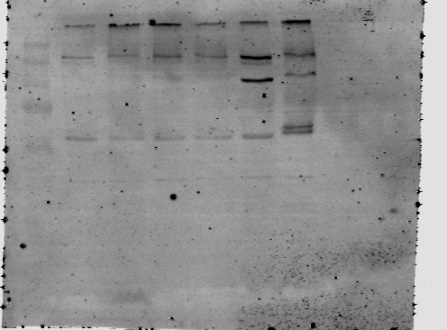

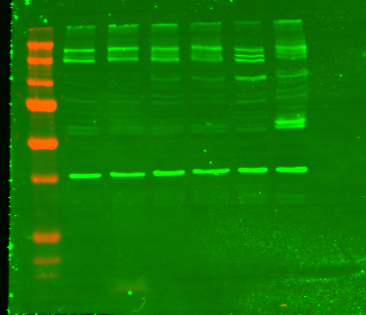


**56 kDa**

**pChk1 (Ser345)**

1. ID8-tChk1


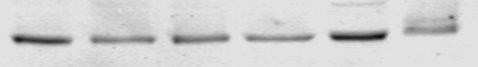


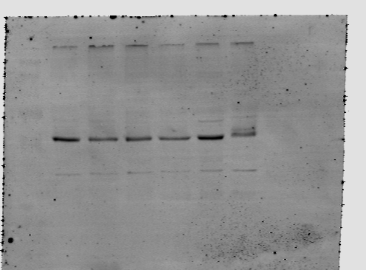

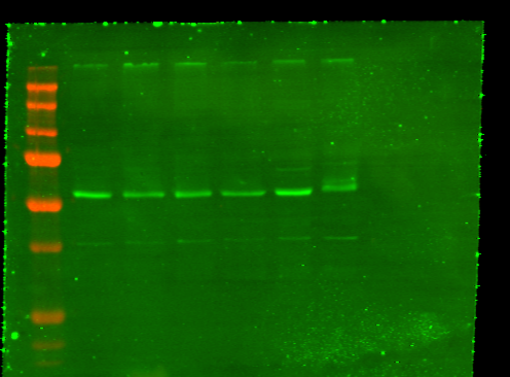


**tChk1**

**56 kDa**

1. ID8-**β- actin**


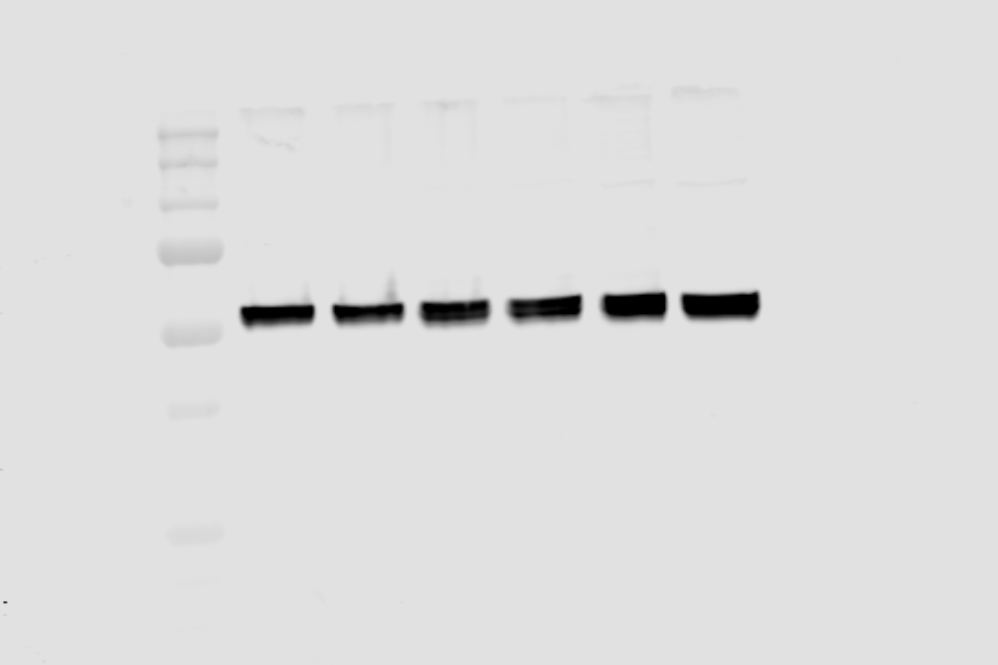


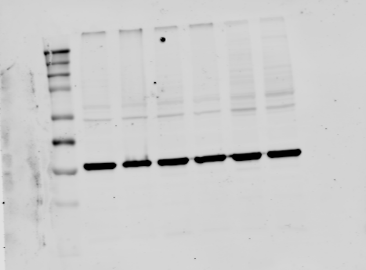

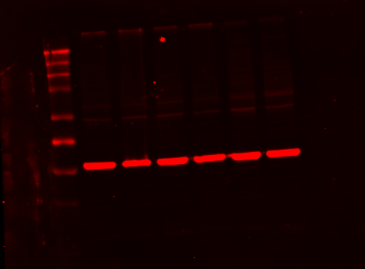


**42 kDa**

**β- actin**

1. IRF1knockdown western blot-OVCAR-5


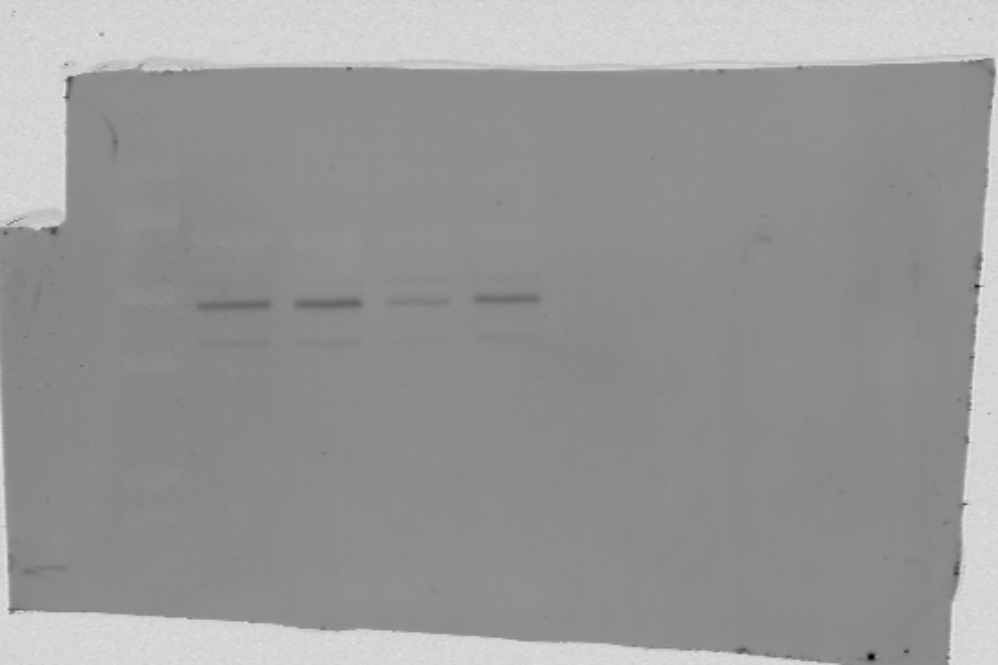


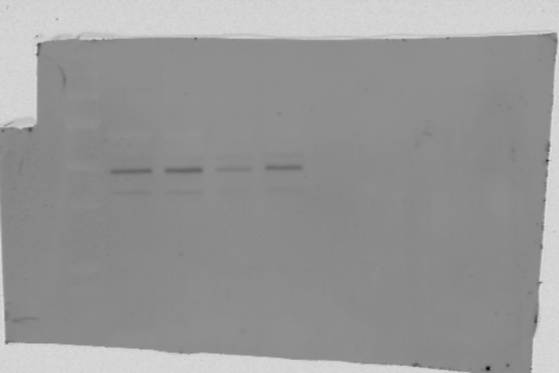

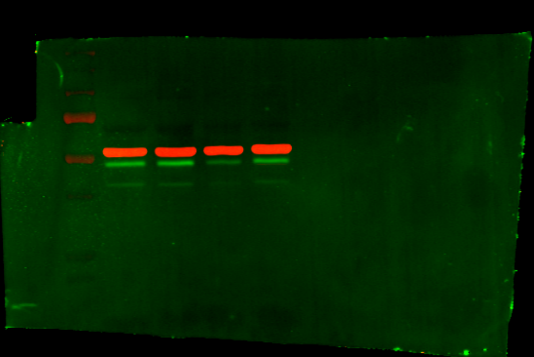


**45-48 kDa**

**55 kDa**

**α-Tubulin**

**IRF1**

1. IRF1knockdown western blot-OVCAR-5 -only tubulin


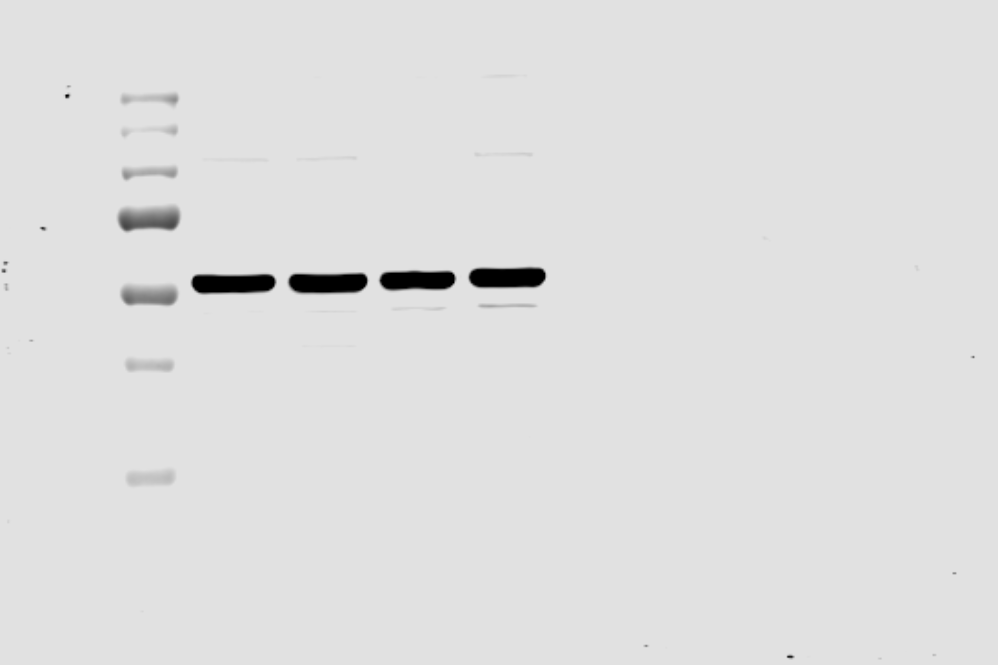


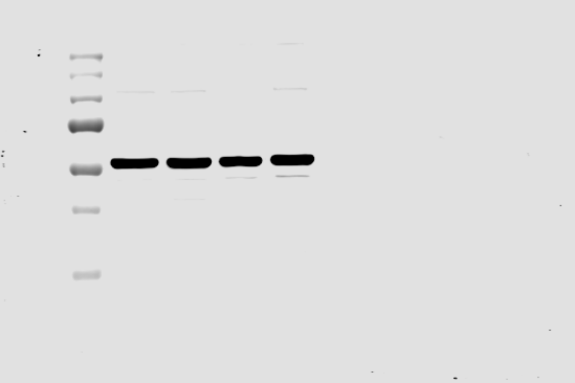

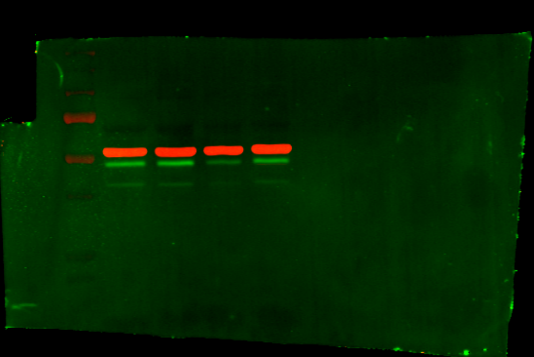


**45-48 kDa**

**IRF1**

**55 kDa**

**α-Tubulin**

1. cGAS blot with all cell lines


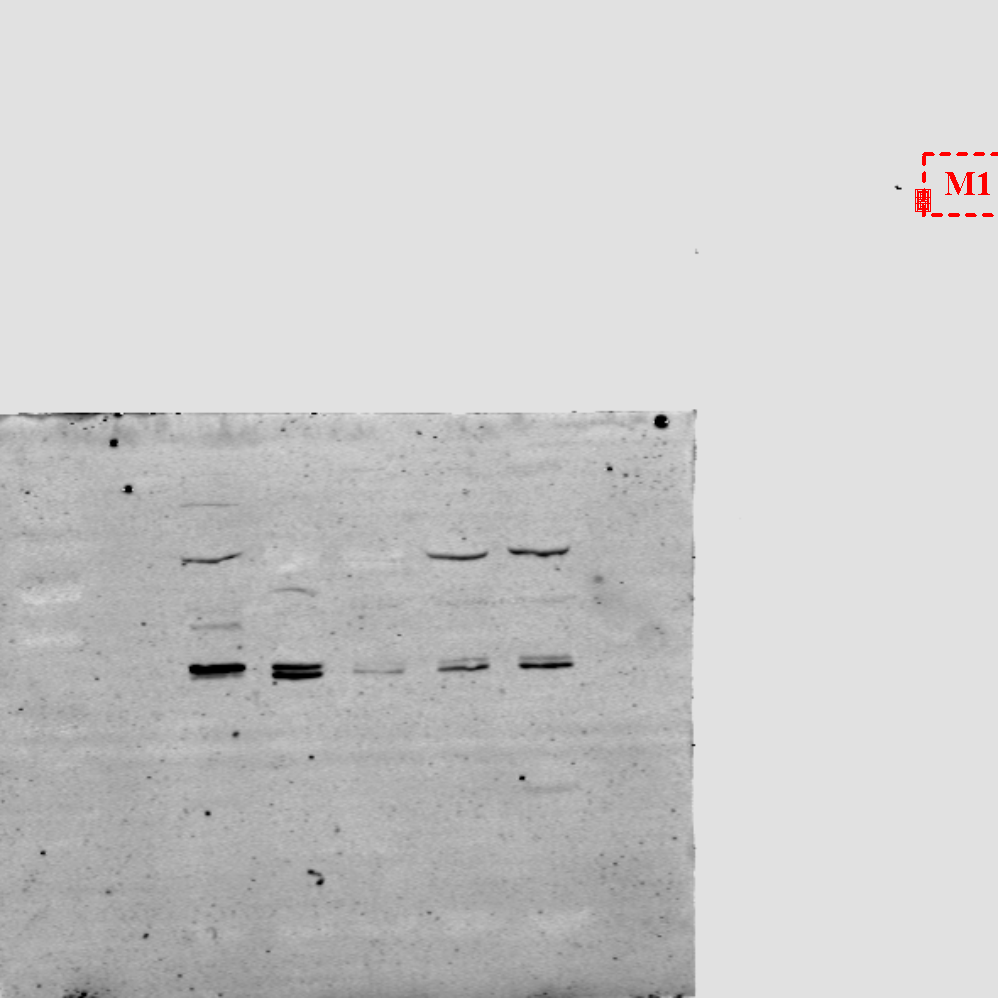


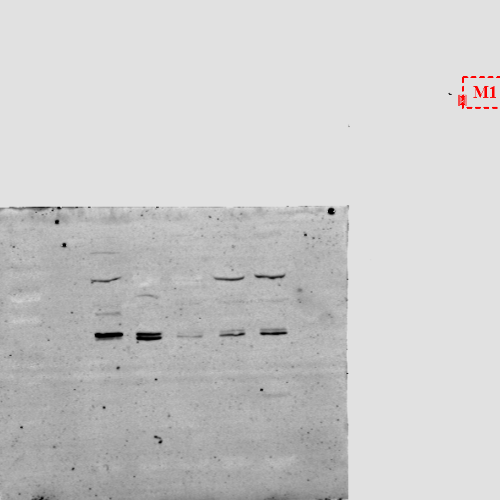

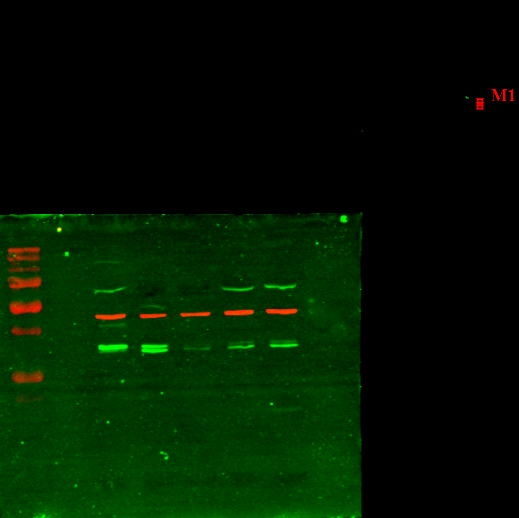


**42kDa**

**Nonspecific**

**β- actin**

**cGAS**

**62 kDa**

1. tSTING blot with all cell lines


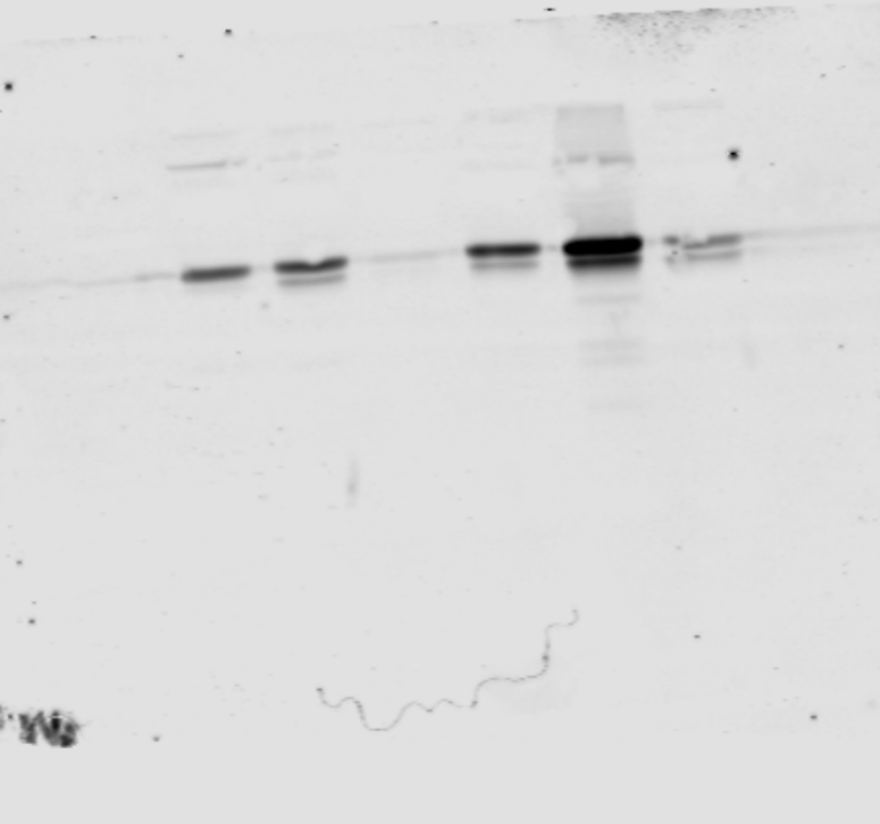


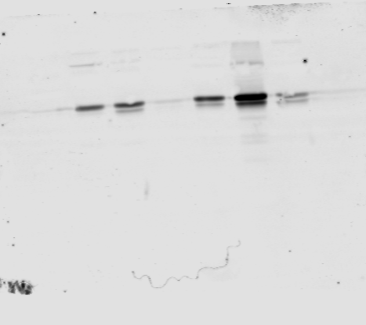

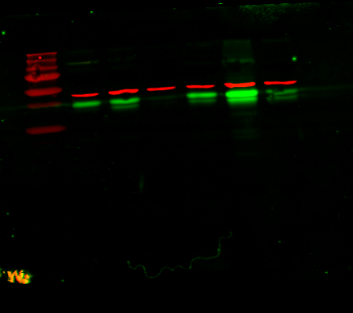


**42kDa**

**β- actin**

**35 kDa**

**tSTING**

**30 KDa**

1. **β** Actin band for cGAS and STING blots


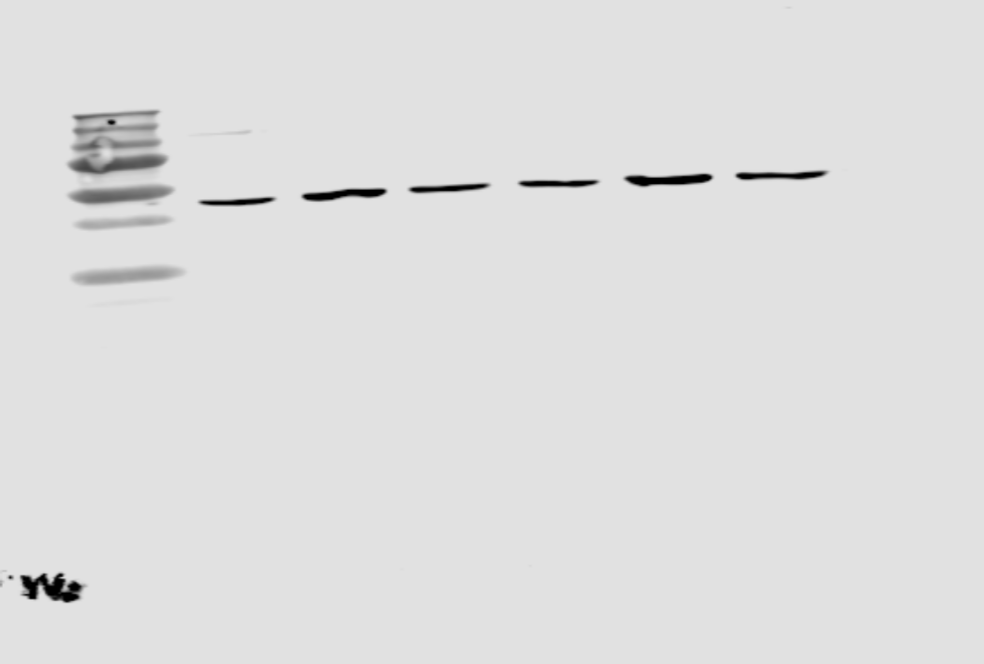


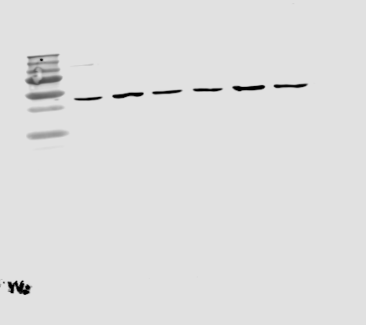

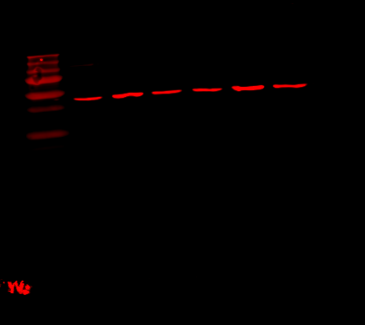


**42kDa**

**β- actin**

1. tSTING blot OVCAR-5


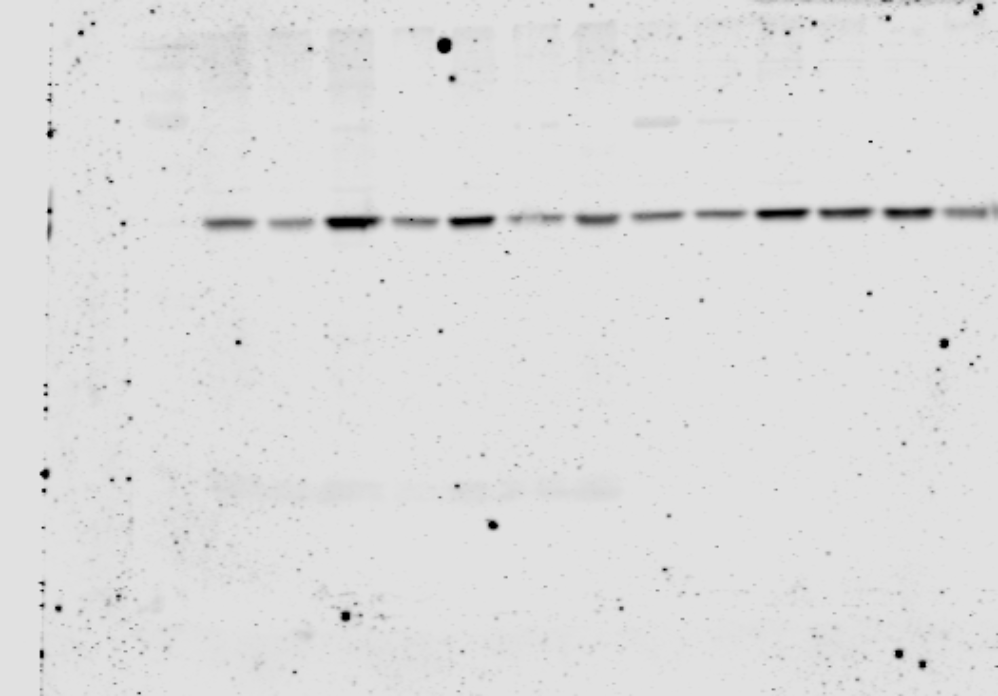


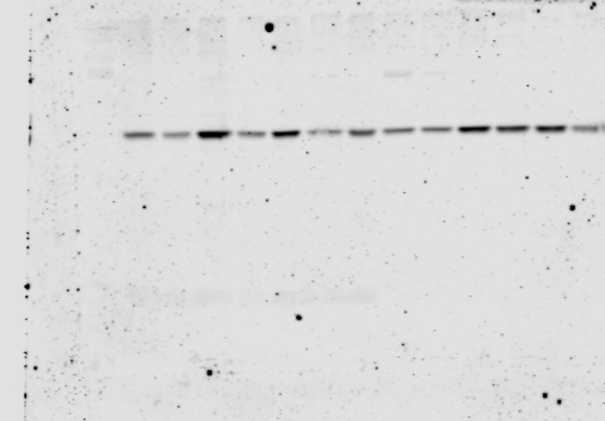

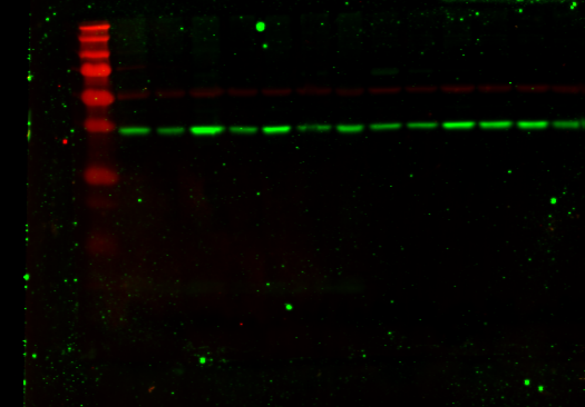


**tSTING**

**35 kDa**

1. pSTING blot-OVCAR5


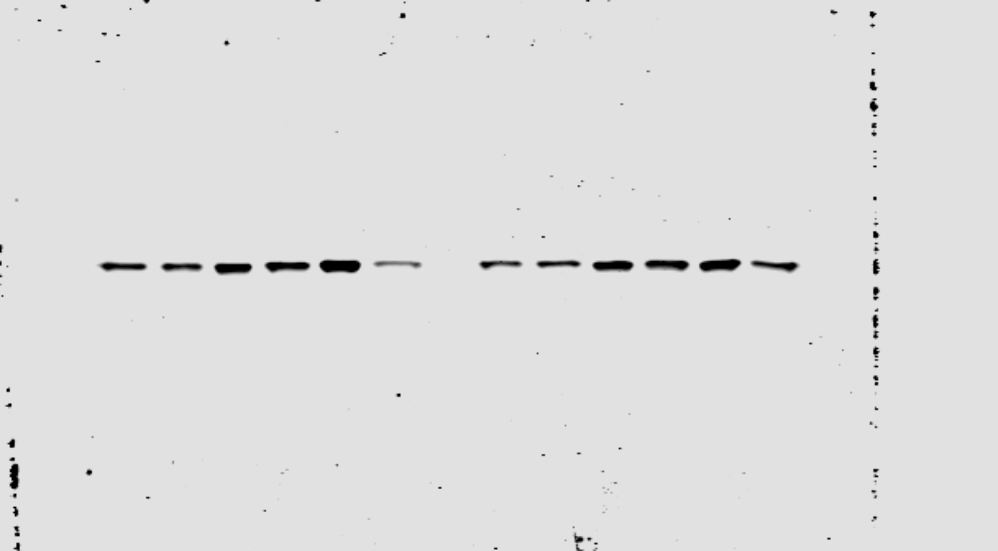


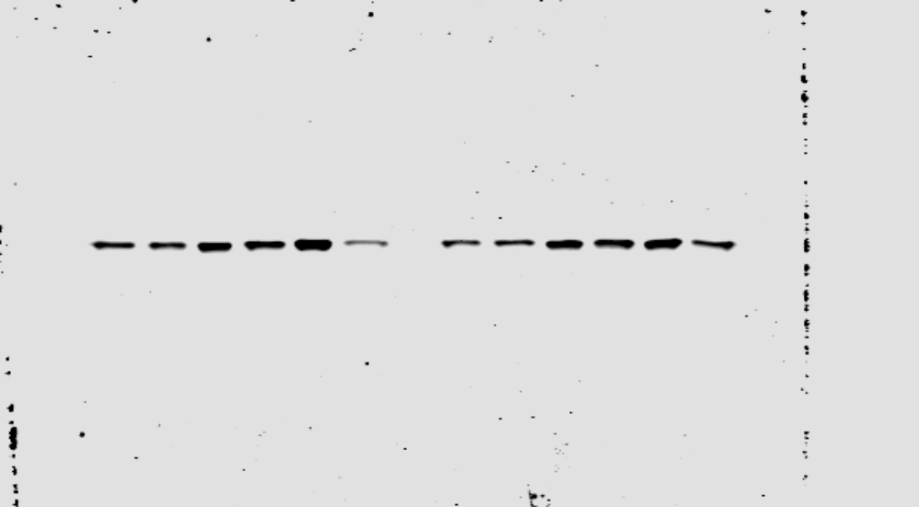

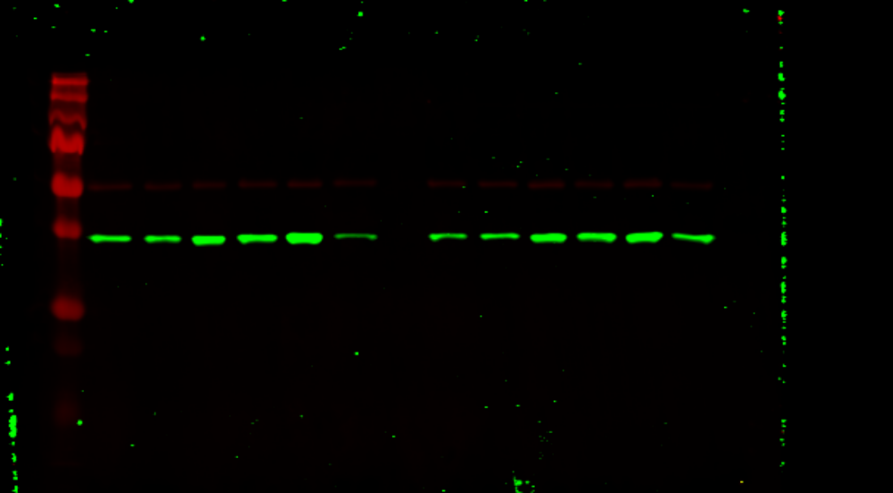


**42 kDa**

**pSTING**

1. tSTAT1 blot -OVCAR-5


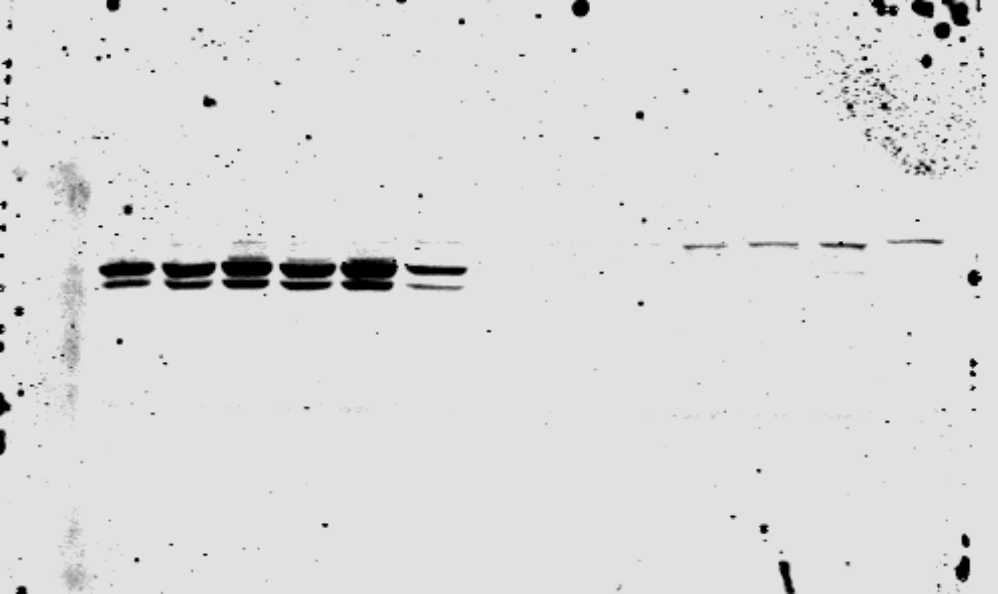


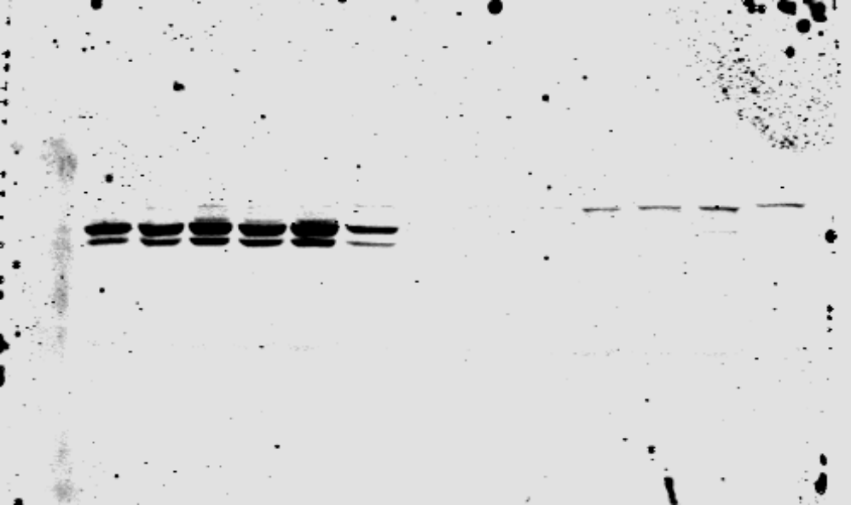

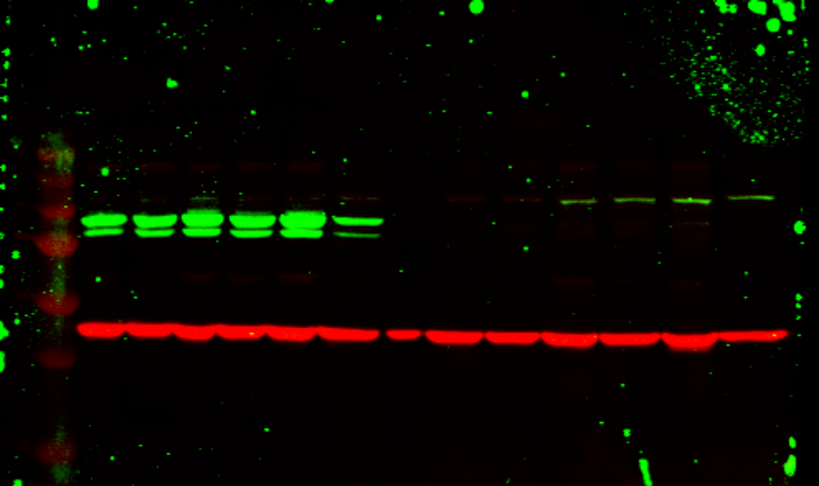


**84 and 91 kDa**

**tSTAT1**

1. cGAS blot OVCAR-5


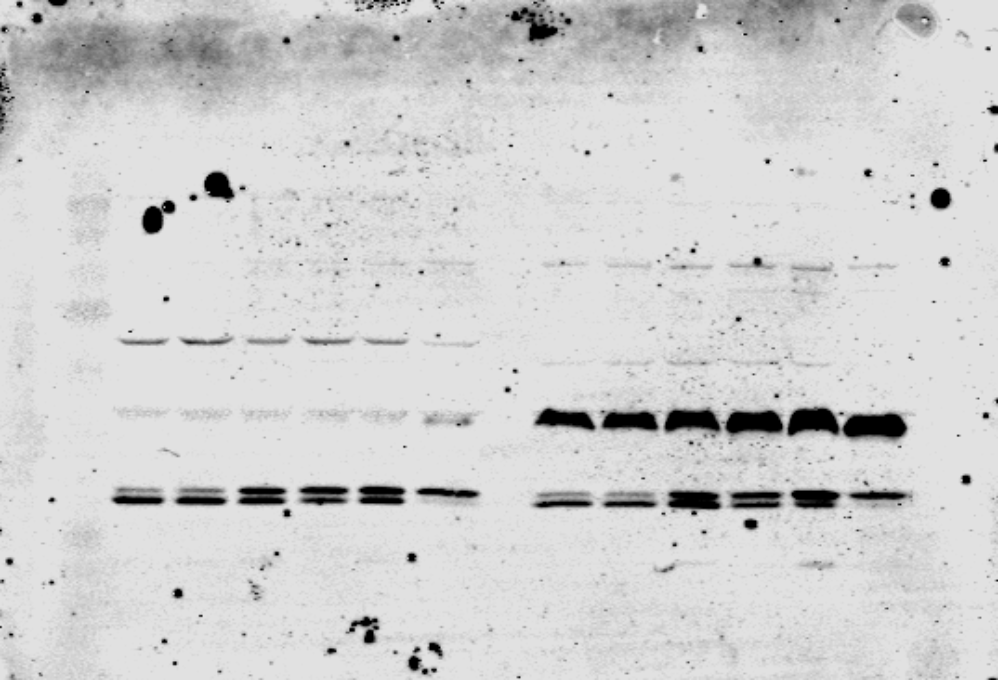


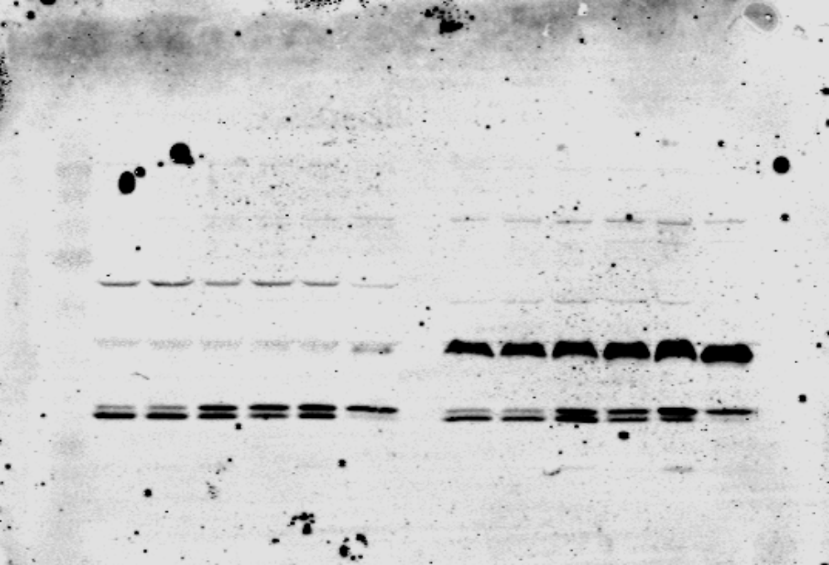

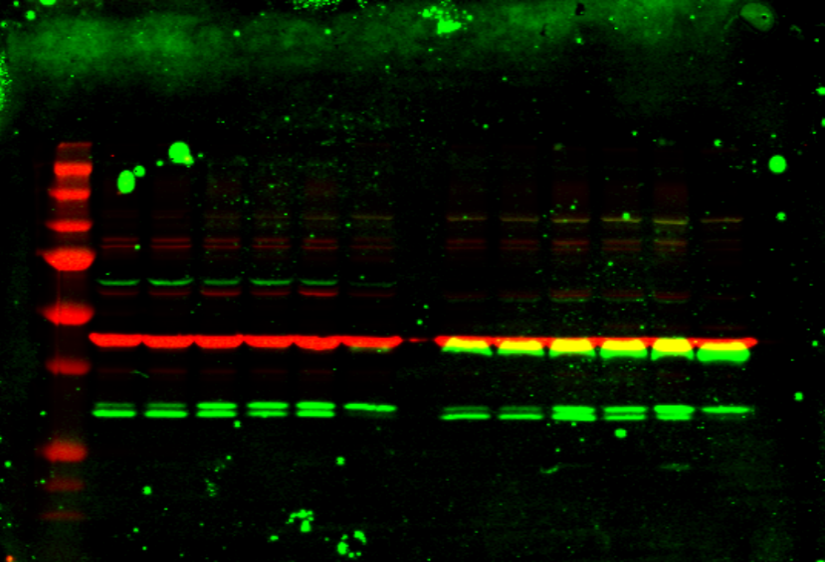


**β- actin**

**42 kDa**

**62 kDa**

**cGAS**

1. pSTAT3 tyr705-OVCAR5


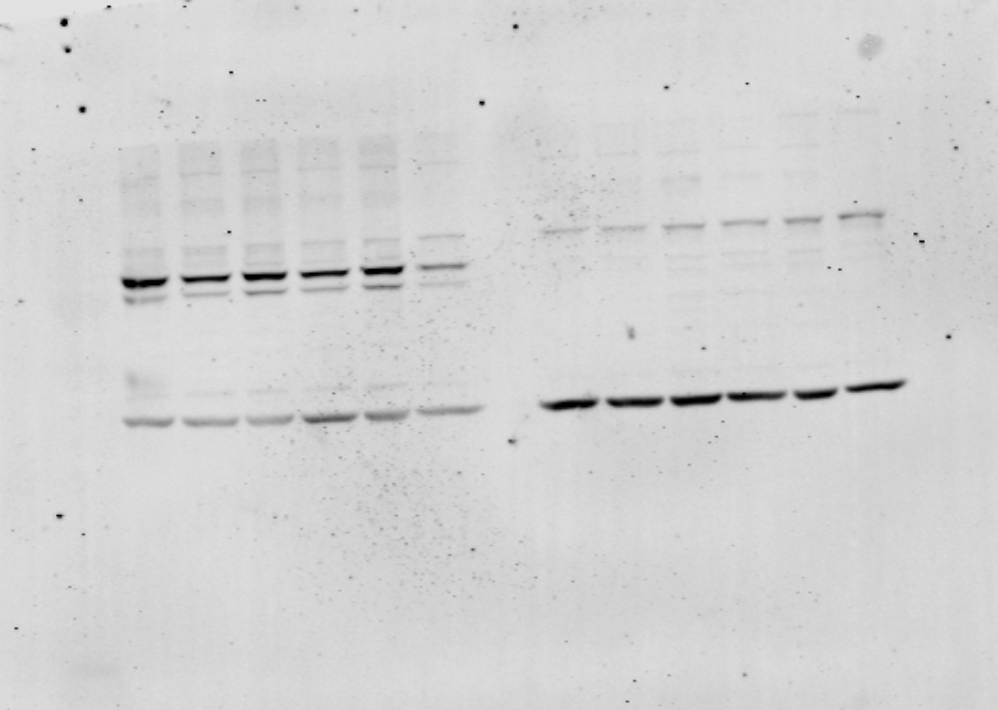


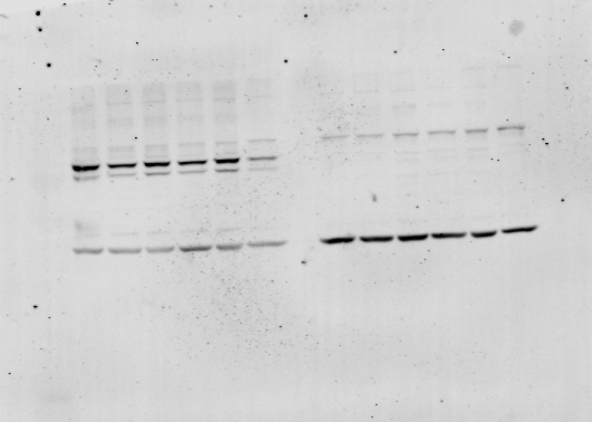

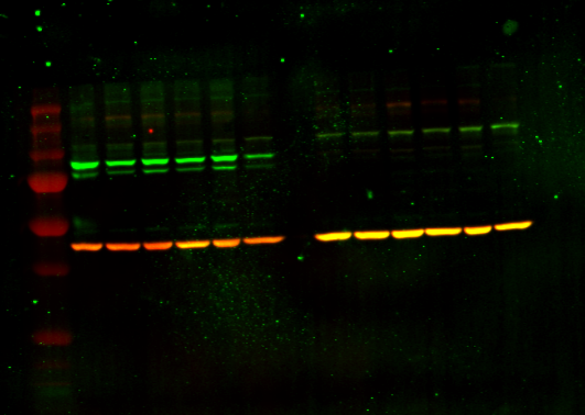


**β- actin**

**42 kDa**

**79 and 86 kDa**

**pSTAT3 (tyr705)**

1. tSTAT3 blot-OVCAR5


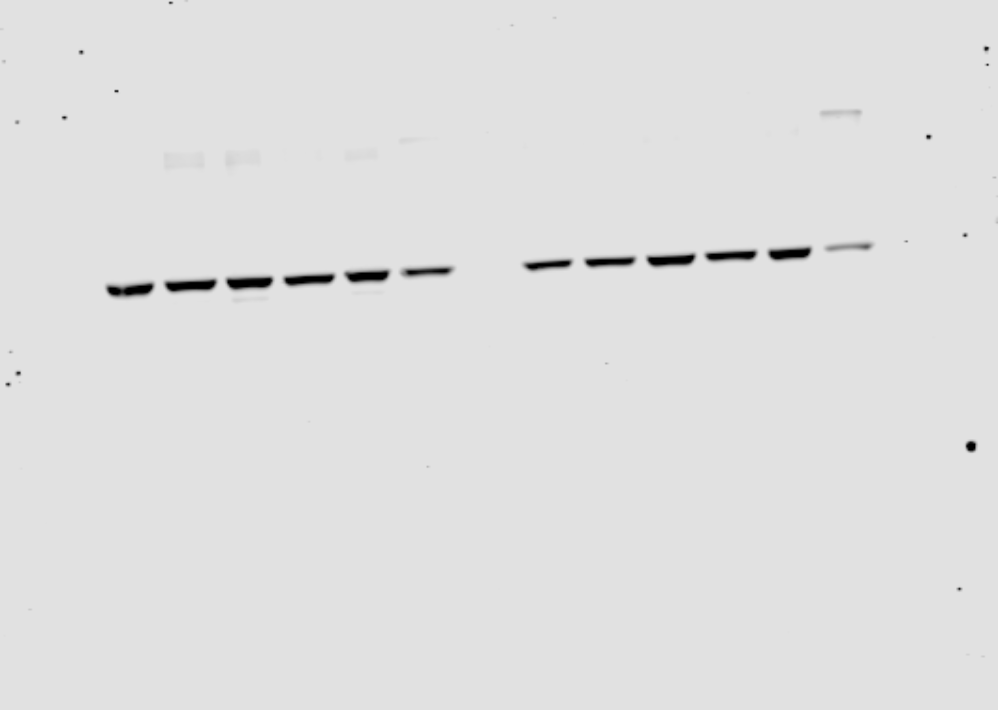


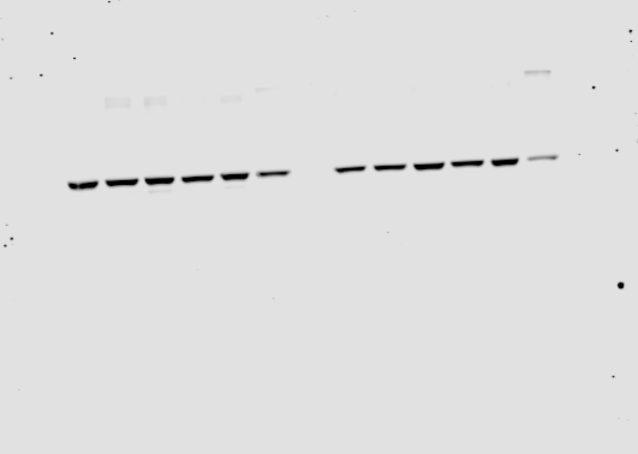

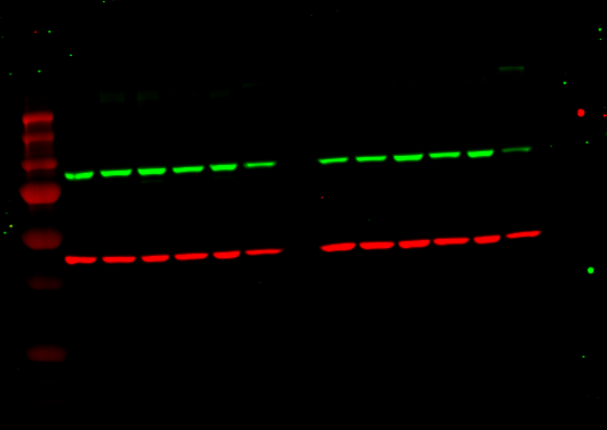


**42kDa**

**β- actin**

**86 kDa**

**tSTAT3**

1. beta actin for STAT1 signaling (OVCAR5)


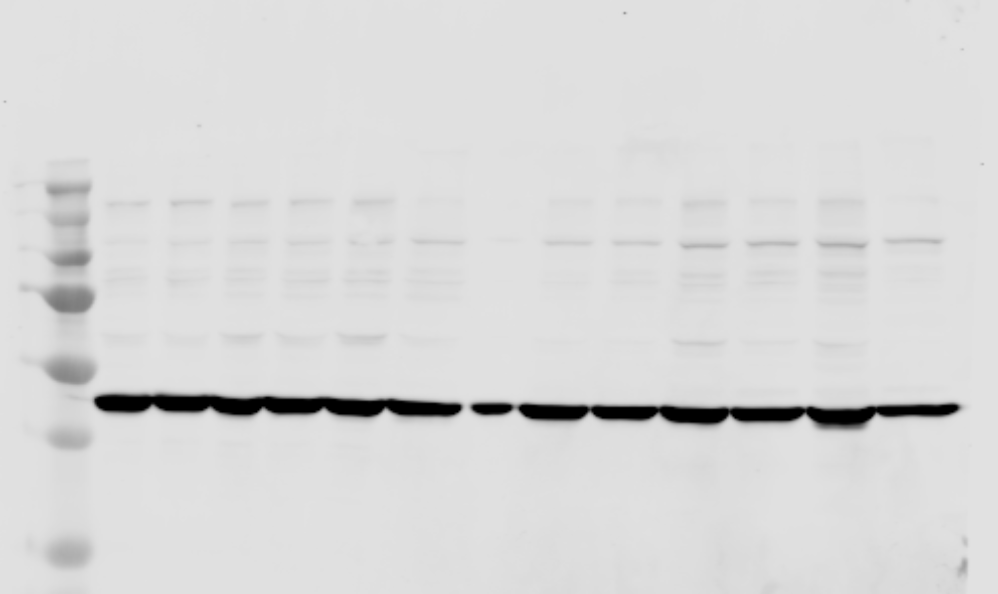


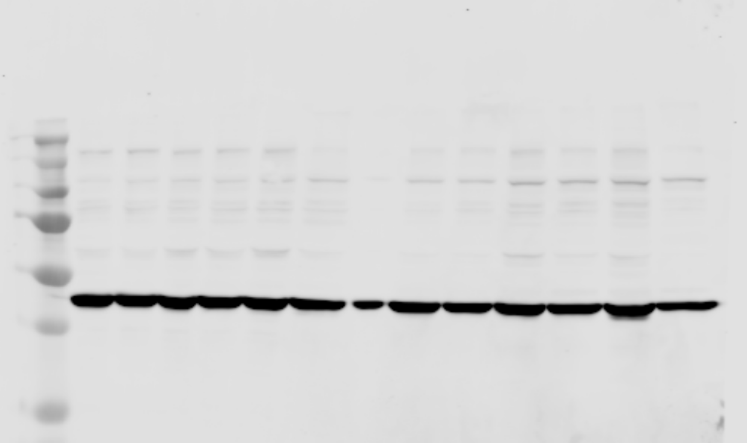

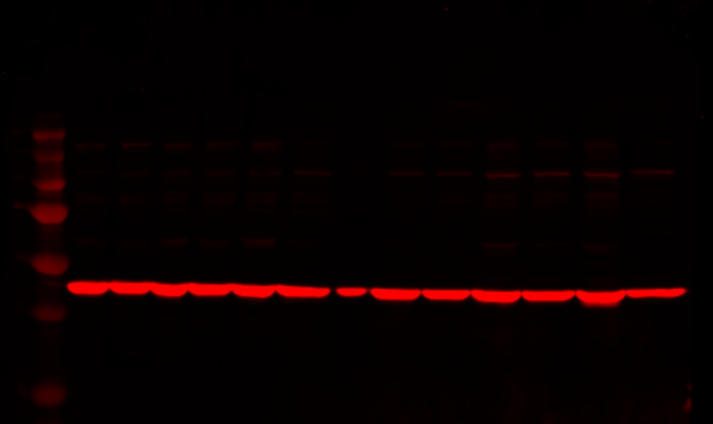


**42kDa**

**β- actin**

1. pSTAT1 ser 727 (OVCAR-5)


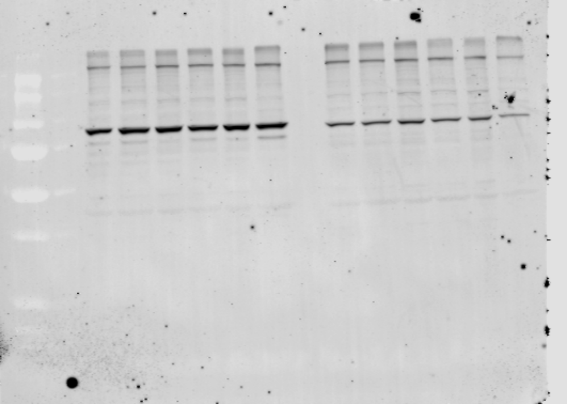

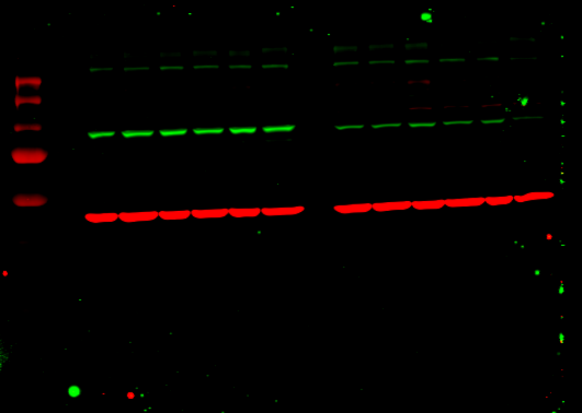


**91 KDa**

**pSTAT1 (ser 727)**

**42KDa**

**β- actin**

1. ID8-pChk2


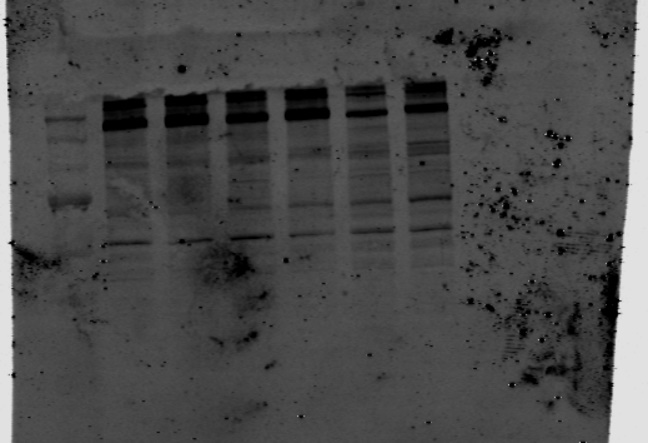

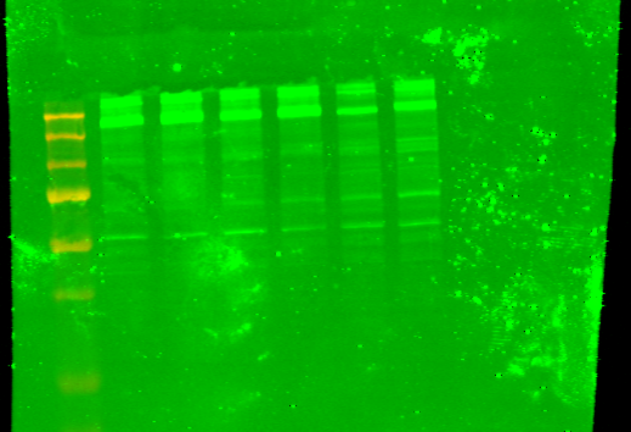


**pChk2 (Thr68)**

**62kDa**


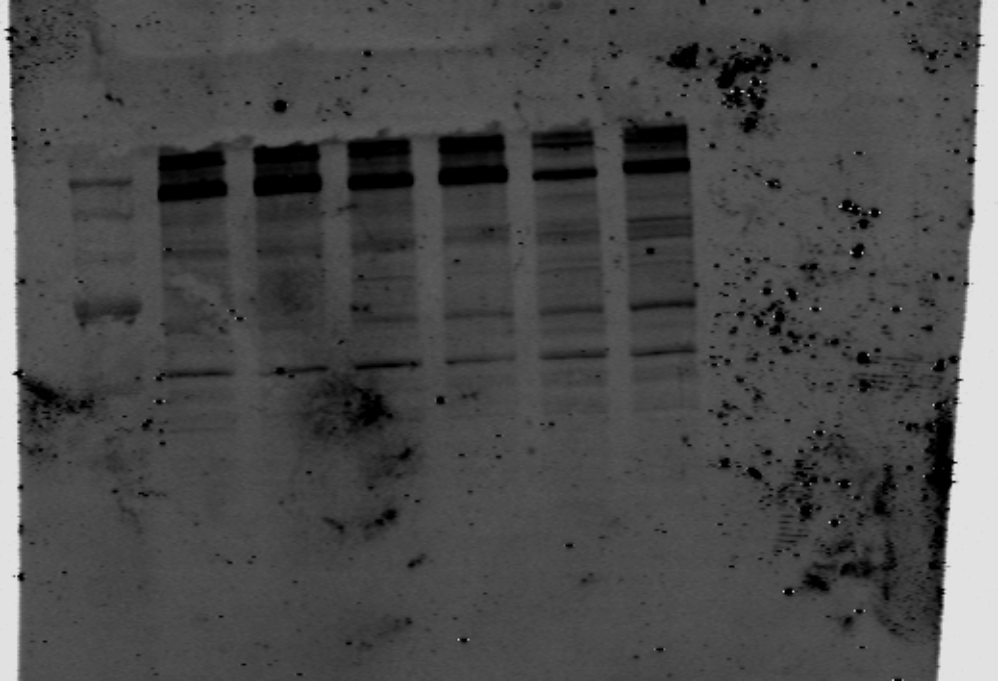


1. ID8-tChk2


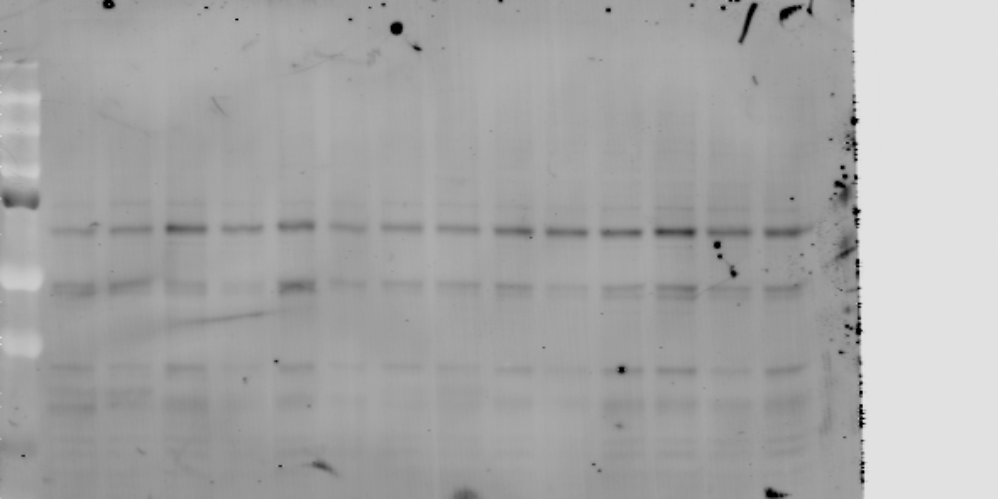


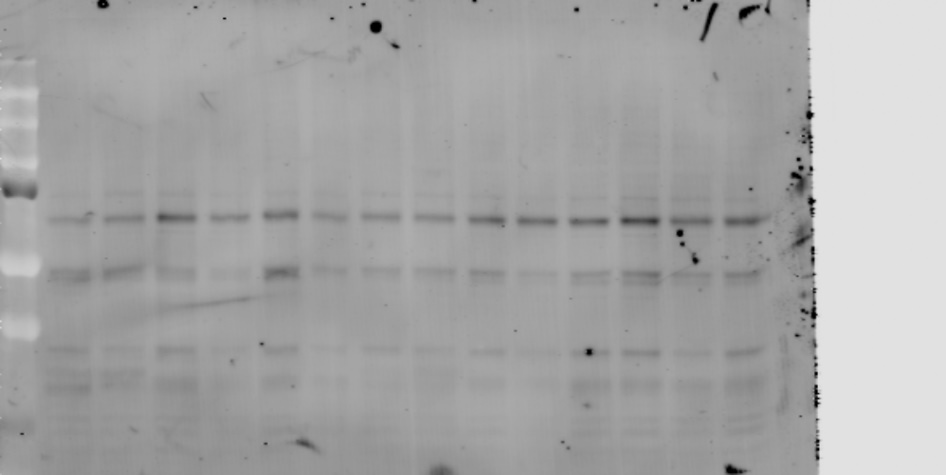

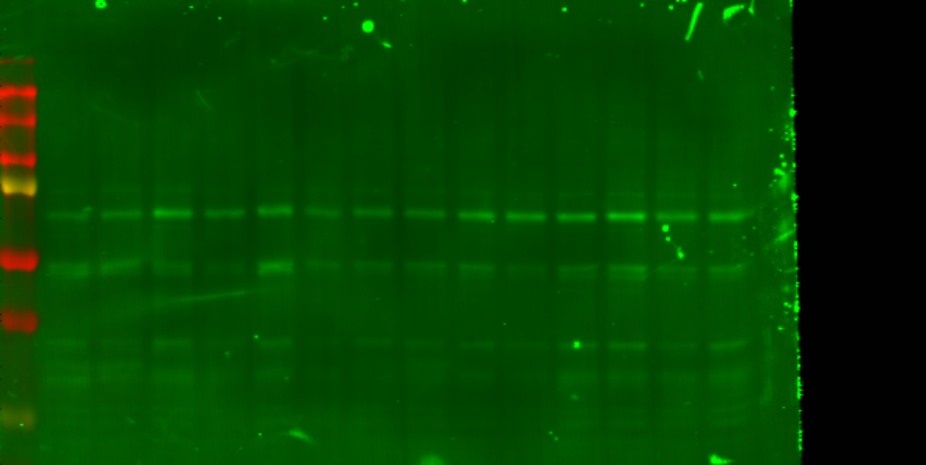


**tChk2**

**62kDa**
