# Supplementary material for: The oxidative phosphorylation inhibitor, atovaquone, upregulates PD-L1 via activation of the ATM/ATR DNA damage response pathway
Source: Research Square preprint supplement (doi:10.21203/rs.3.rs-9476762/v1), 2026-04-28
Supplement: Supplementary file 1 [file 141dc4eda1d45f941fc09b9c.xlsx]

## Sheet: Sheet1
Table 1: Histologic analysis of liver samples from all treatment groups
	Non neoplastic liver	Modular regenerative hyperplasia	Sinusoidal dilation	Lymphocyte infiltration
Castor Oil + Antibody control	y*	y	n**	n
	y	n	n	n
	y	y	n	n
	y	n	n	y (mild)
	y	n	n	n
Atovaquone only (200 mg/kg)	y	n	n	n
	y	n	n	n
	y	n	n	n
	y	n	n	n
	y	y	n	n
anti PD-L1 antibody (2.5 mg/kg)	y	n	n	y (mild)
	y	n	n	y (mild)
	y	n	n	y (mild)
	y	y	n	n
Atovaquone (200 mg/kg) + anti PD-L1 antibody (2.5 mg/kg)	y	n	n	y (moderate)
	y	y	n	n
	y	n	n	y
*y=yes/present; **n=no/not present
