# Supplementary material for: The oxidative phosphorylation inhibitor, atovaquone, upregulates PD-L1 via activation of the ATM/ATR DNA damage response pathway
Source: Research Square preprint supplement (doi:10.21203/rs.3.rs-9476762/v1), 2026-04-28
Supplement: Supplementary file 2 [file 191fa91f7452cc93939a15f9.xlsx]

## Sheet: Sheet1
Target antibodies	Antibody Type / Clone	Application	Conjugate	Dilution Factor	Catalog Number	Vendor
Phospho-ATM (Ser1981) (D6H9) (human)	Rabbit mAb	Western blot	Unconjugated	1000	5883	Cell Signaling Technology
Total ATM (D2E2)	Rabbit mAb	Western blot	Unconjugated	1000	2873	Cell Signaling Technology
Phospho-ATR (Thr1989) (D5K8W) (human)	Rabbit mAb	Western blot	Unconjugated	1000	30632	Cell Signaling Technology
Total ATR (E1S3S)	Rabbit mAb	Western blot	Unconjugated	1000	13934	Cell Signaling Technology
Phospho-Chk1 (Ser345) (133D3)	Rabbit mAb	Western blot	Unconjugated	1000	2348	Cell Signaling Technology
Total CHK1 (E9M4D)	Rabbit mAb	Western blot	Unconjugated	1000	37010	Cell Signaling Technology
Phospho-Chk2 (Thr68)	Rabbit PAb	Western blot	Unconjugated	1000	PA5-104715	Cell Signaling Technology
Total CHK2	Rabbit mAb	Western blot	Unconjugated	1000	2662	Cell Signaling Technology
IRF-1 (D5E4) XP®	Rabbit mAb	Western blot	Unconjugated	1000	8478	Cell Signaling Technology
cGAS (D1D3G)	Rabbit mAb	Western blot	Unconjugated	1000	15102	Cell Signaling Technology
α-Tubulin (DM1A)	Mouse mAb	IF / Western blot	Unconjugated	1000	3873	Sigma Aldrich
Phospho-STING (Ser366)	Rabbit pAb	Western blot	Unconjugated	1000	PA5-105674	Invitrogen
total STING	Rabbit mAb	Western blot	Unconjugated	1000	3337	Cell Signaling Technology
Phospho-Stat1 (Ser727) (D3B7)	Rabbit mAb	Western blot	Unconjugated	1000	8826	Cell Signaling Technology
Phospho-Stat3 (Tyr705) (D3A7) XP®	Rabbit mAb	Western blot	Unconjugated	1000	9145	Cell Signaling Technology
total STAT3 (79D7)	Rabbit mAb	Western blot	Unconjugated	1000	4904	Cell Signaling Technology
total STAT1 (D1K9Y)	Rabbit mAb	Western blot	Unconjugated	1000	14994	Cell Signaling Technology
β-Actin (8H10D10)	Mouse mAb	Western blot	Unconjugated	1000	3700	Cell Signaling Technology
PD-L1 (anti-mouse CD274) (B7-H1)	Rabbit mAb	Flow cytometry	APC	500	124312	BioLegend
PD-L1 (anti-human CD274) (B7-H1)	Mouse/Rat mAb	Flow cytometry	BV-711	500	329721	BioLegend
8-OHdG	Mouse mAb (E-8)	Flow cytometry	PE	100	sc-393871 PE	Santa Cruz Biotechnology
Anti-EpCAM	Rabbit pAb	Multiplex IHC	Unconjugated	100	ab71916	Abcam
Goat anti-Mouse IgG (H+L)	Polyclonal	IF	Alexa Fluor™ Plus 555	500	A-21422	Invitrogen
Goat anti-Rabbit IgG	Polyclonal	Western blot	IRDye® 680RD	10000	926-68071	LI-COR Biosciences
Goat anti-Mouse IgG	Polyclonal	Western blot	IRDye® 800CW	10000	926-32210	LI-COR Biosciences
