# Supplementary material for: The oxidative phosphorylation inhibitor, atovaquone, upregulates PD-L1 via activation of the ATM/ATR DNA damage response pathway
Source: Research Square preprint supplement (doi:10.21203/rs.3.rs-9476762/v1), 2026-04-28
Supplement: Supplementary file 5 [file 558f328e067e05cd948c977a.xlsx]

## Sheet: Sheet1
	Shape Descriptors	How to interpret results?
	Perimeter	High values relative to area suggest larger/irregular shapes
	Aspect Ratio (AR)	A perfect circle (1.0). Higher values- elongated
	Solidity	Values close to 1.0 indicates smooth nucleus vs chromatin aggregation/anomalies
