# Supplementary material for: The oxidative phosphorylation inhibitor, atovaquone, upregulates PD-L1 via activation of the ATM/ATR DNA damage response pathway
Source: Research Square preprint supplement (doi:10.21203/rs.3.rs-9476762/v1), 2026-04-28
Supplement: Supplementary file 6 [file 62e1fb7951fc5e54793f0230.xlsx]

## Sheet: Sheet1
Reagent	Catalog Number	Vendor
AZD0156 (ATM inhibitor)	S837502	Selleck Chem
Ceralasertib (AZD6738) (ATR inhibitor)	HY-19323	MedChemExpress
Atovaquone ≥98.0% (by HPLC, titration analysis)	95233-18-4	Avantor
DMSO	J66650.AP	ThermoFisher Scientific
PX-478 (HIF1ɑ inhibitor)	S7612	Selleck Chem
Fludarabine (STAT1 inhibitor)	S1491	Selleck Chem
Quant-iT PicoGreen dsDNA Reagent	P11495	Invitrogen
Castor Oil	259853	Sigma Aldrich
InVivoMAb anti-mouse PD-L1 (B7-H1)	BE0101	Bio X Cell
D-Luciferin Potassium Salt	222PS	MediLumine
shIRF1 Lentiviral vectors		Vector Builder
Intercept™ (TBS) Blocking Buffer	927-60001	LiCOR Biosciences
